# Supplementary material
Source: PubMed Central journal article supplement (PMC4817128)
Supplement: supp_dju189_Supplementary_figure_1.pdf [file supp_dju189_Supplementary_figure_1.pdf]

CCNA1

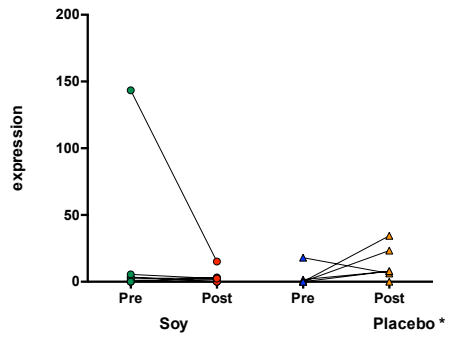

CCNE2

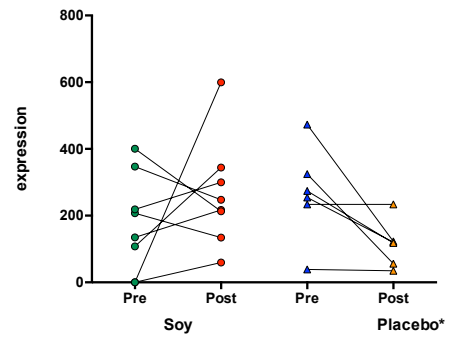

CDKN1A

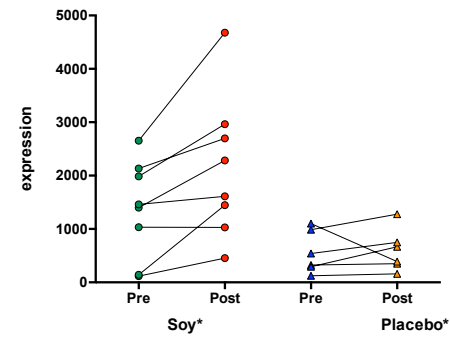

CDKN1B

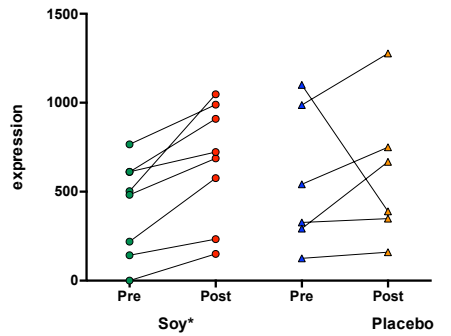

DLC1

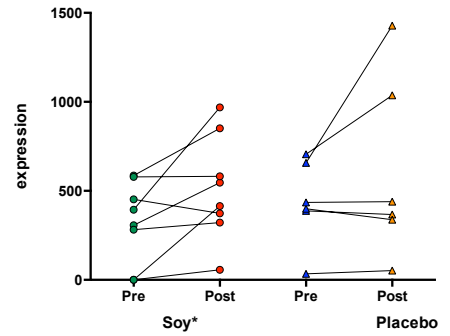

EGFR

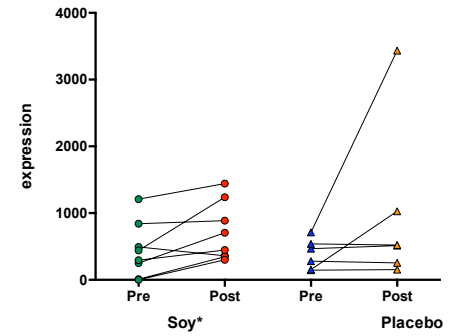

FANCC

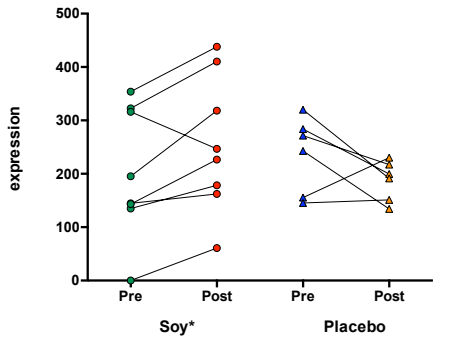

HDAC1

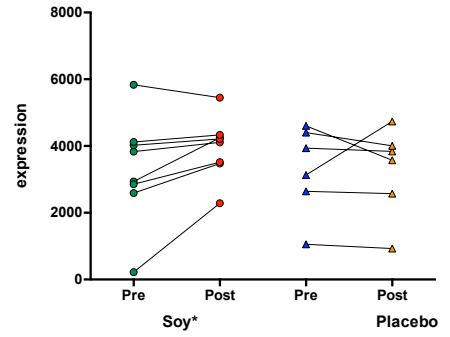

HIST2H3C

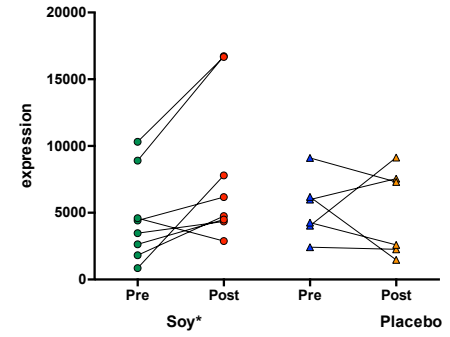

● Pretreatment Soy      ▲ Pretreatment Placebo  
● Post-treatment soy      ▲ Post-treatment Placebo

\*p<0.05 for pre vs post expression

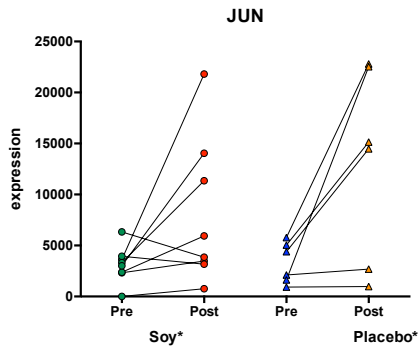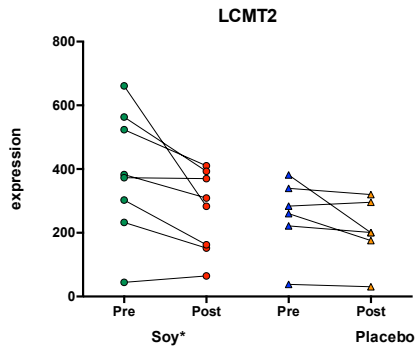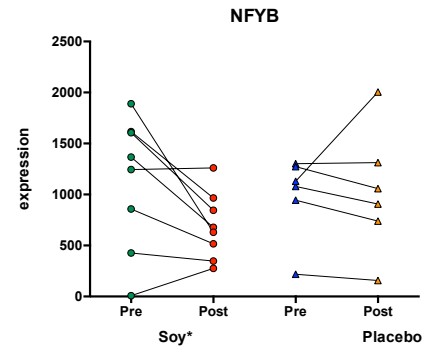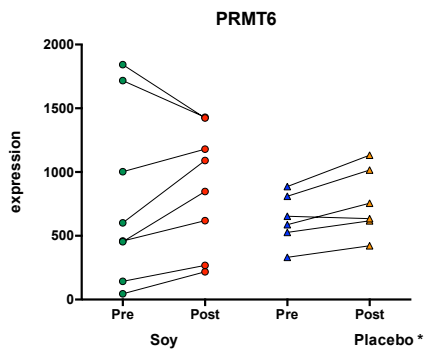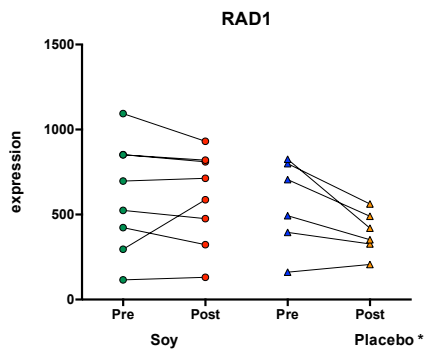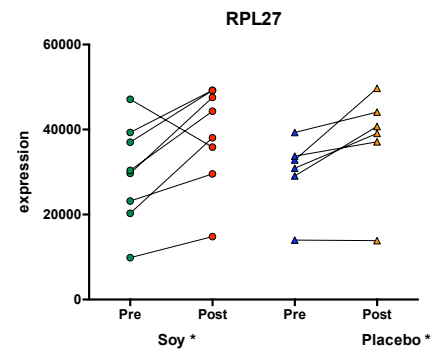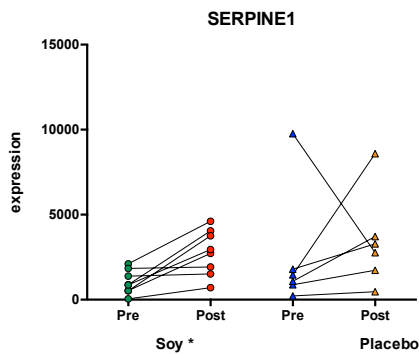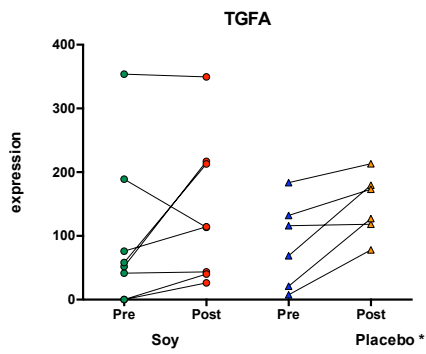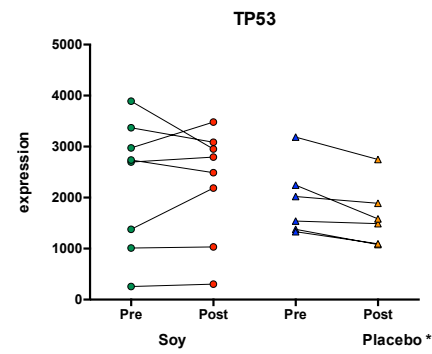

● Pretreatment Soy      ▲ Pretreatment Placebo  
● Post-treatment soy      ▲ Post-treatment Placebo

\*p<0.05 for pre vs post expression

UGT1A4

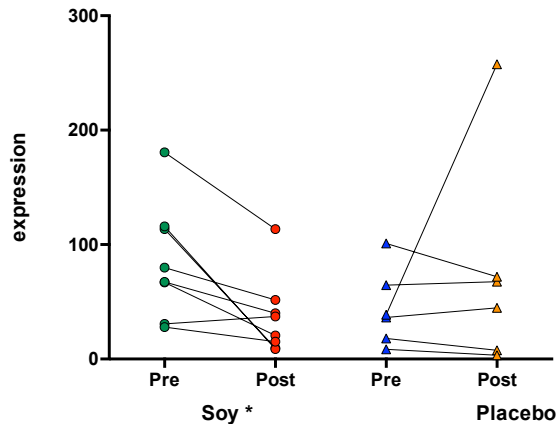

UGT2A1

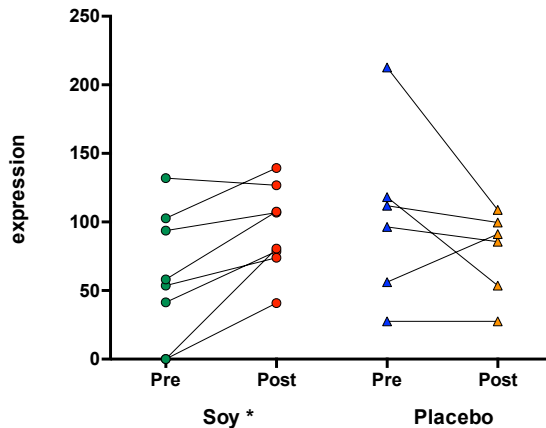

● Pretreatment Soy      ▲ Pretreatment Placebo  
● Post-treatment soy      ▲ Post-treatment Placebo

\*  $p < 0.05$  for pre vs post expression
