# Supplementary material
Source: PubMed Central journal article supplement (PMC4817128)

Supplementary Figure S3

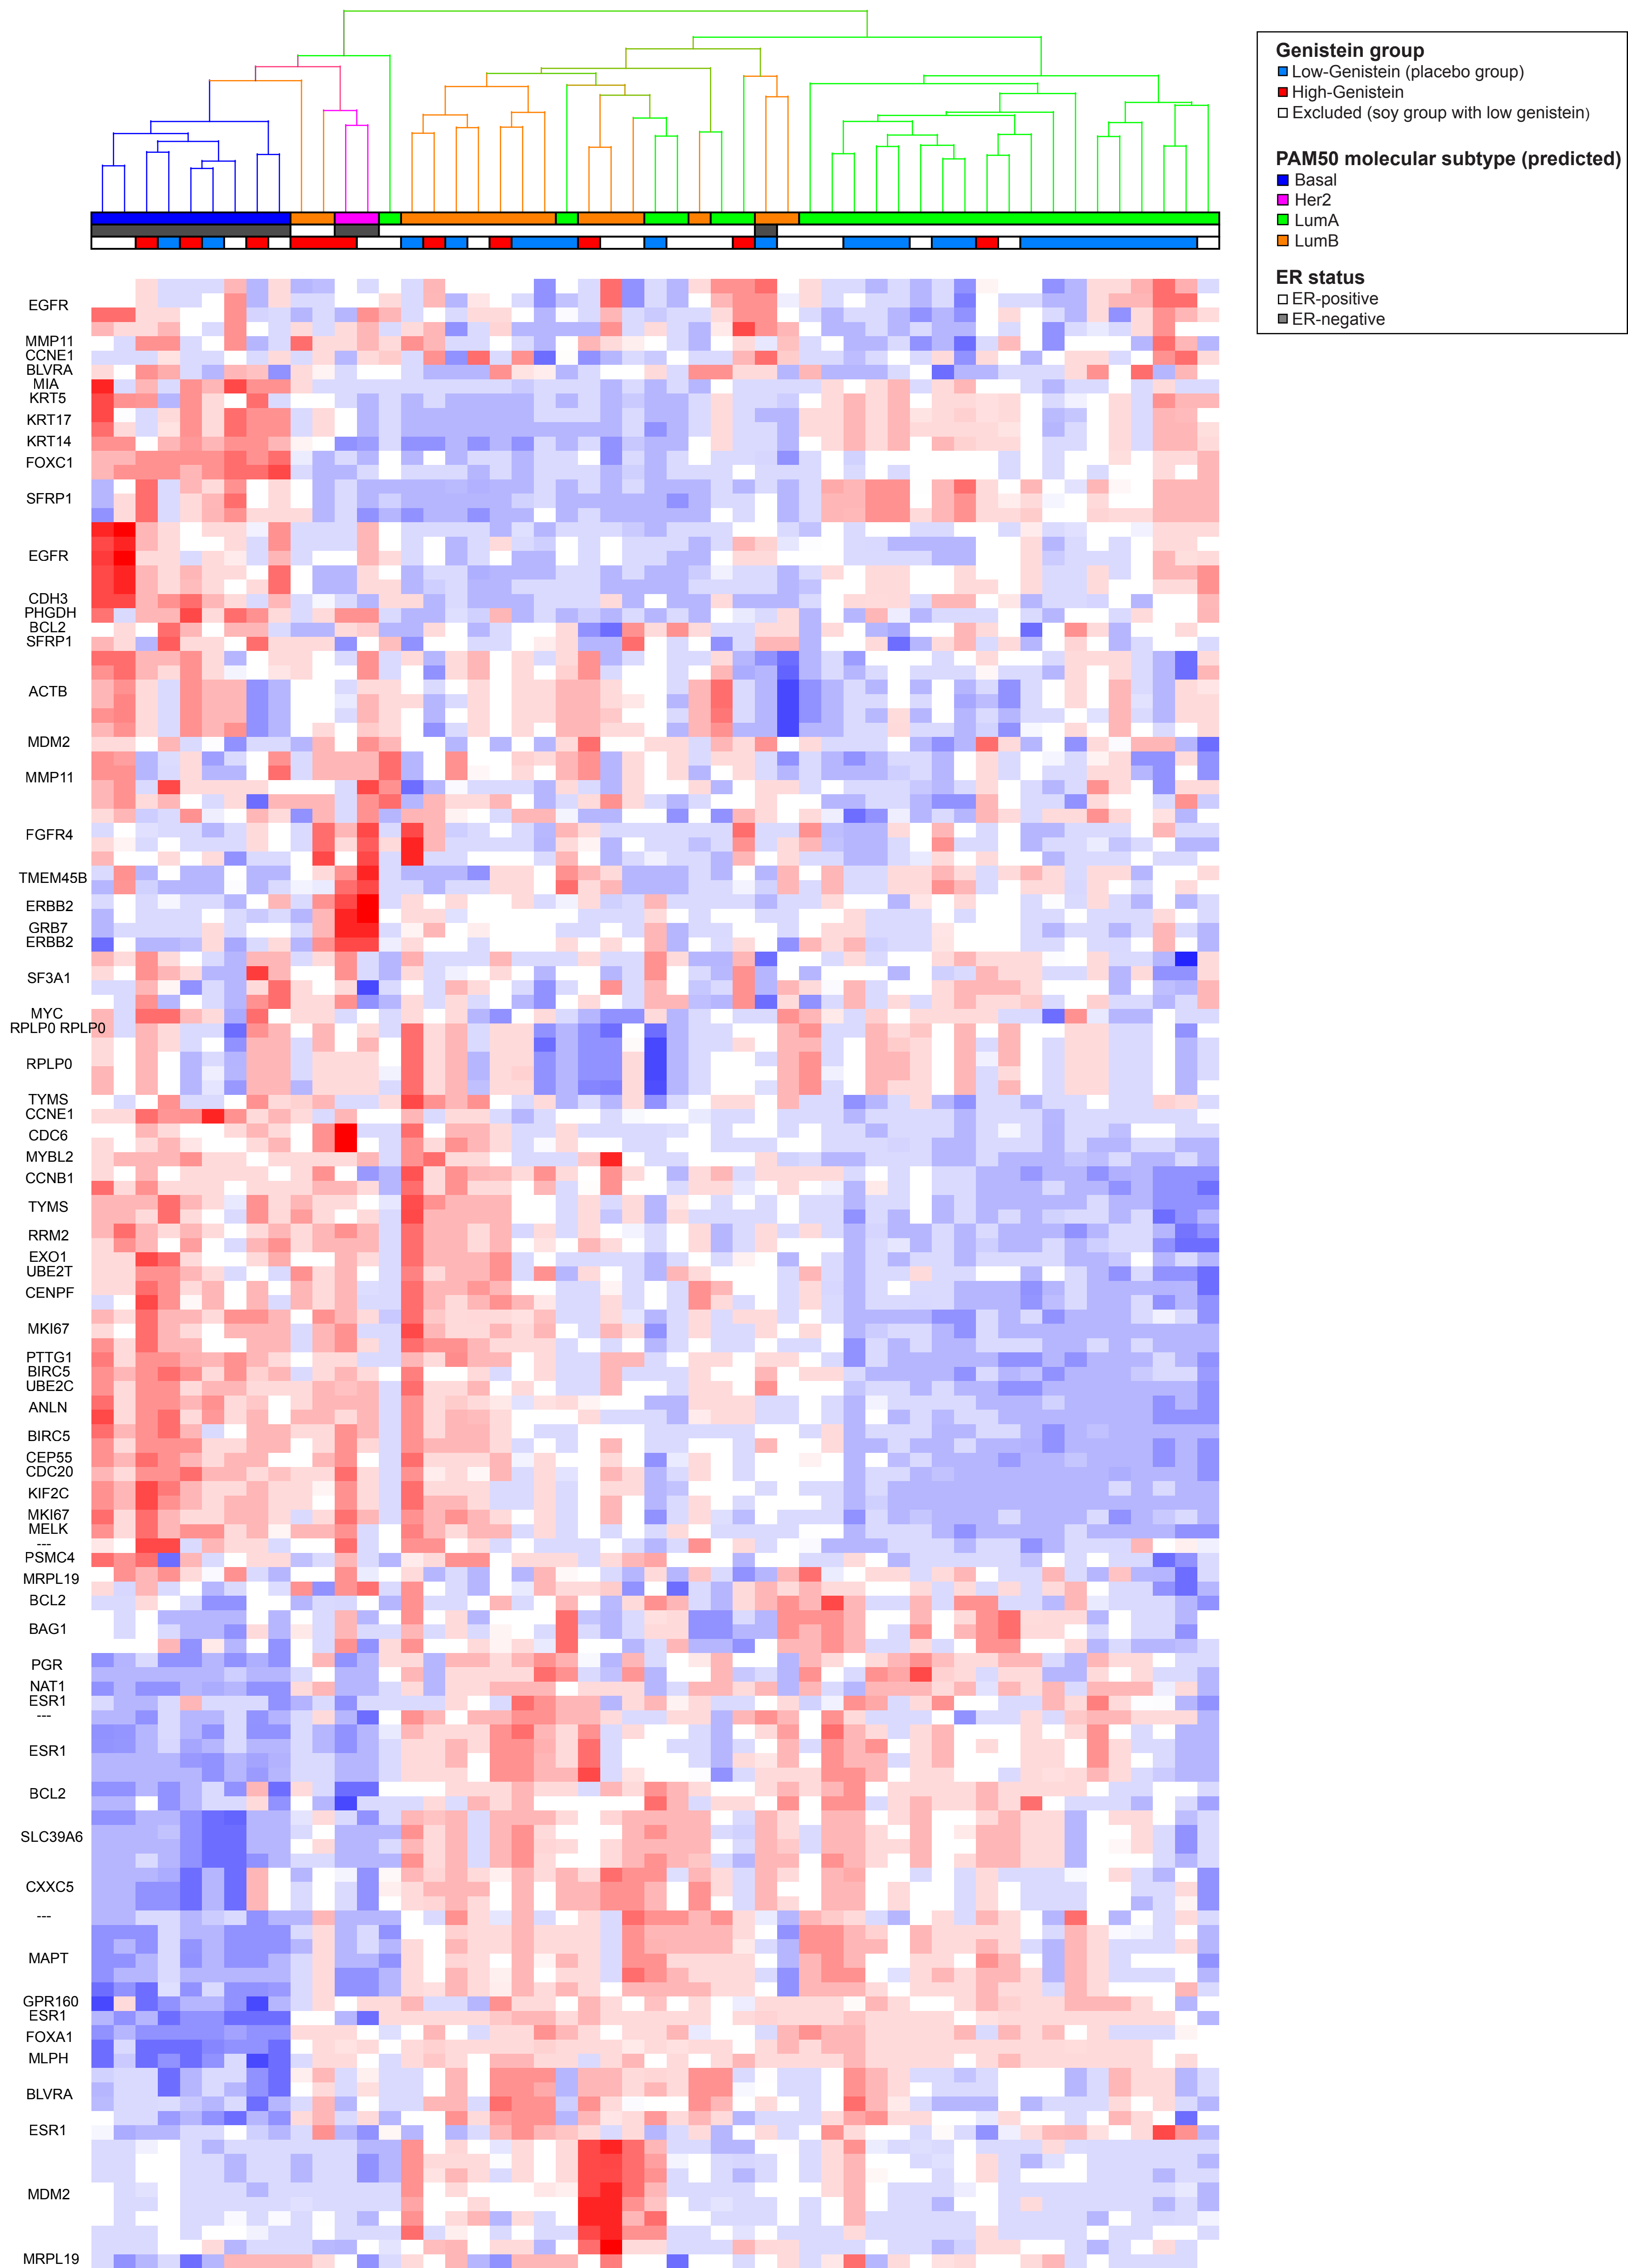

Supplement: supp_dju189_Sup_Fig_3_updated.pdf [file supp_dju189_Sup_Fig_3_updated.pdf]
